# Supplementary material for: Identifying ENSO-Related Interannual and Decadal Variability on Terrestrial Water Storage
Source: Research Square preprint supplement (doi:10.21203/rs.3.rs-199961/v1), 2021-02-17
Supplement: Supplementary file 1 [file 1bb2e062d99db03a61aeaf03.docx]

Supplementary Information: Figures

Identifying ENSO-related interannual and decadal variability on terrestrial water storage

S.-H. Cheon1,*, B. D. Hamlington1, J.T. Reager1, and H. A. Chandanpurkar1

1Jet Propulsion Laboratory, California Institute of Technology, Pasadena, CA 91109, USA.

*shcheon95@gmail.com

Introduction

We provide three figures which can help the readers to have a clear understanding of the current paper.

Figure S1 is the map having the value of correlation coefficient between the Interannual climate index and CSEOF HF-mode at each 1x1 grid point.

Figure S2 and 3 are the loading vectors’ spatial patterns of LF-mode and HF mode of the GRACE’s CSEOF analysis over 2003-2016. To increase the readability, we provide the seasonal mean of the initial results in the paper. To give the readers a chance to see the original spatial patterns of CSEOF loading vectors, we provide these supporting figures.


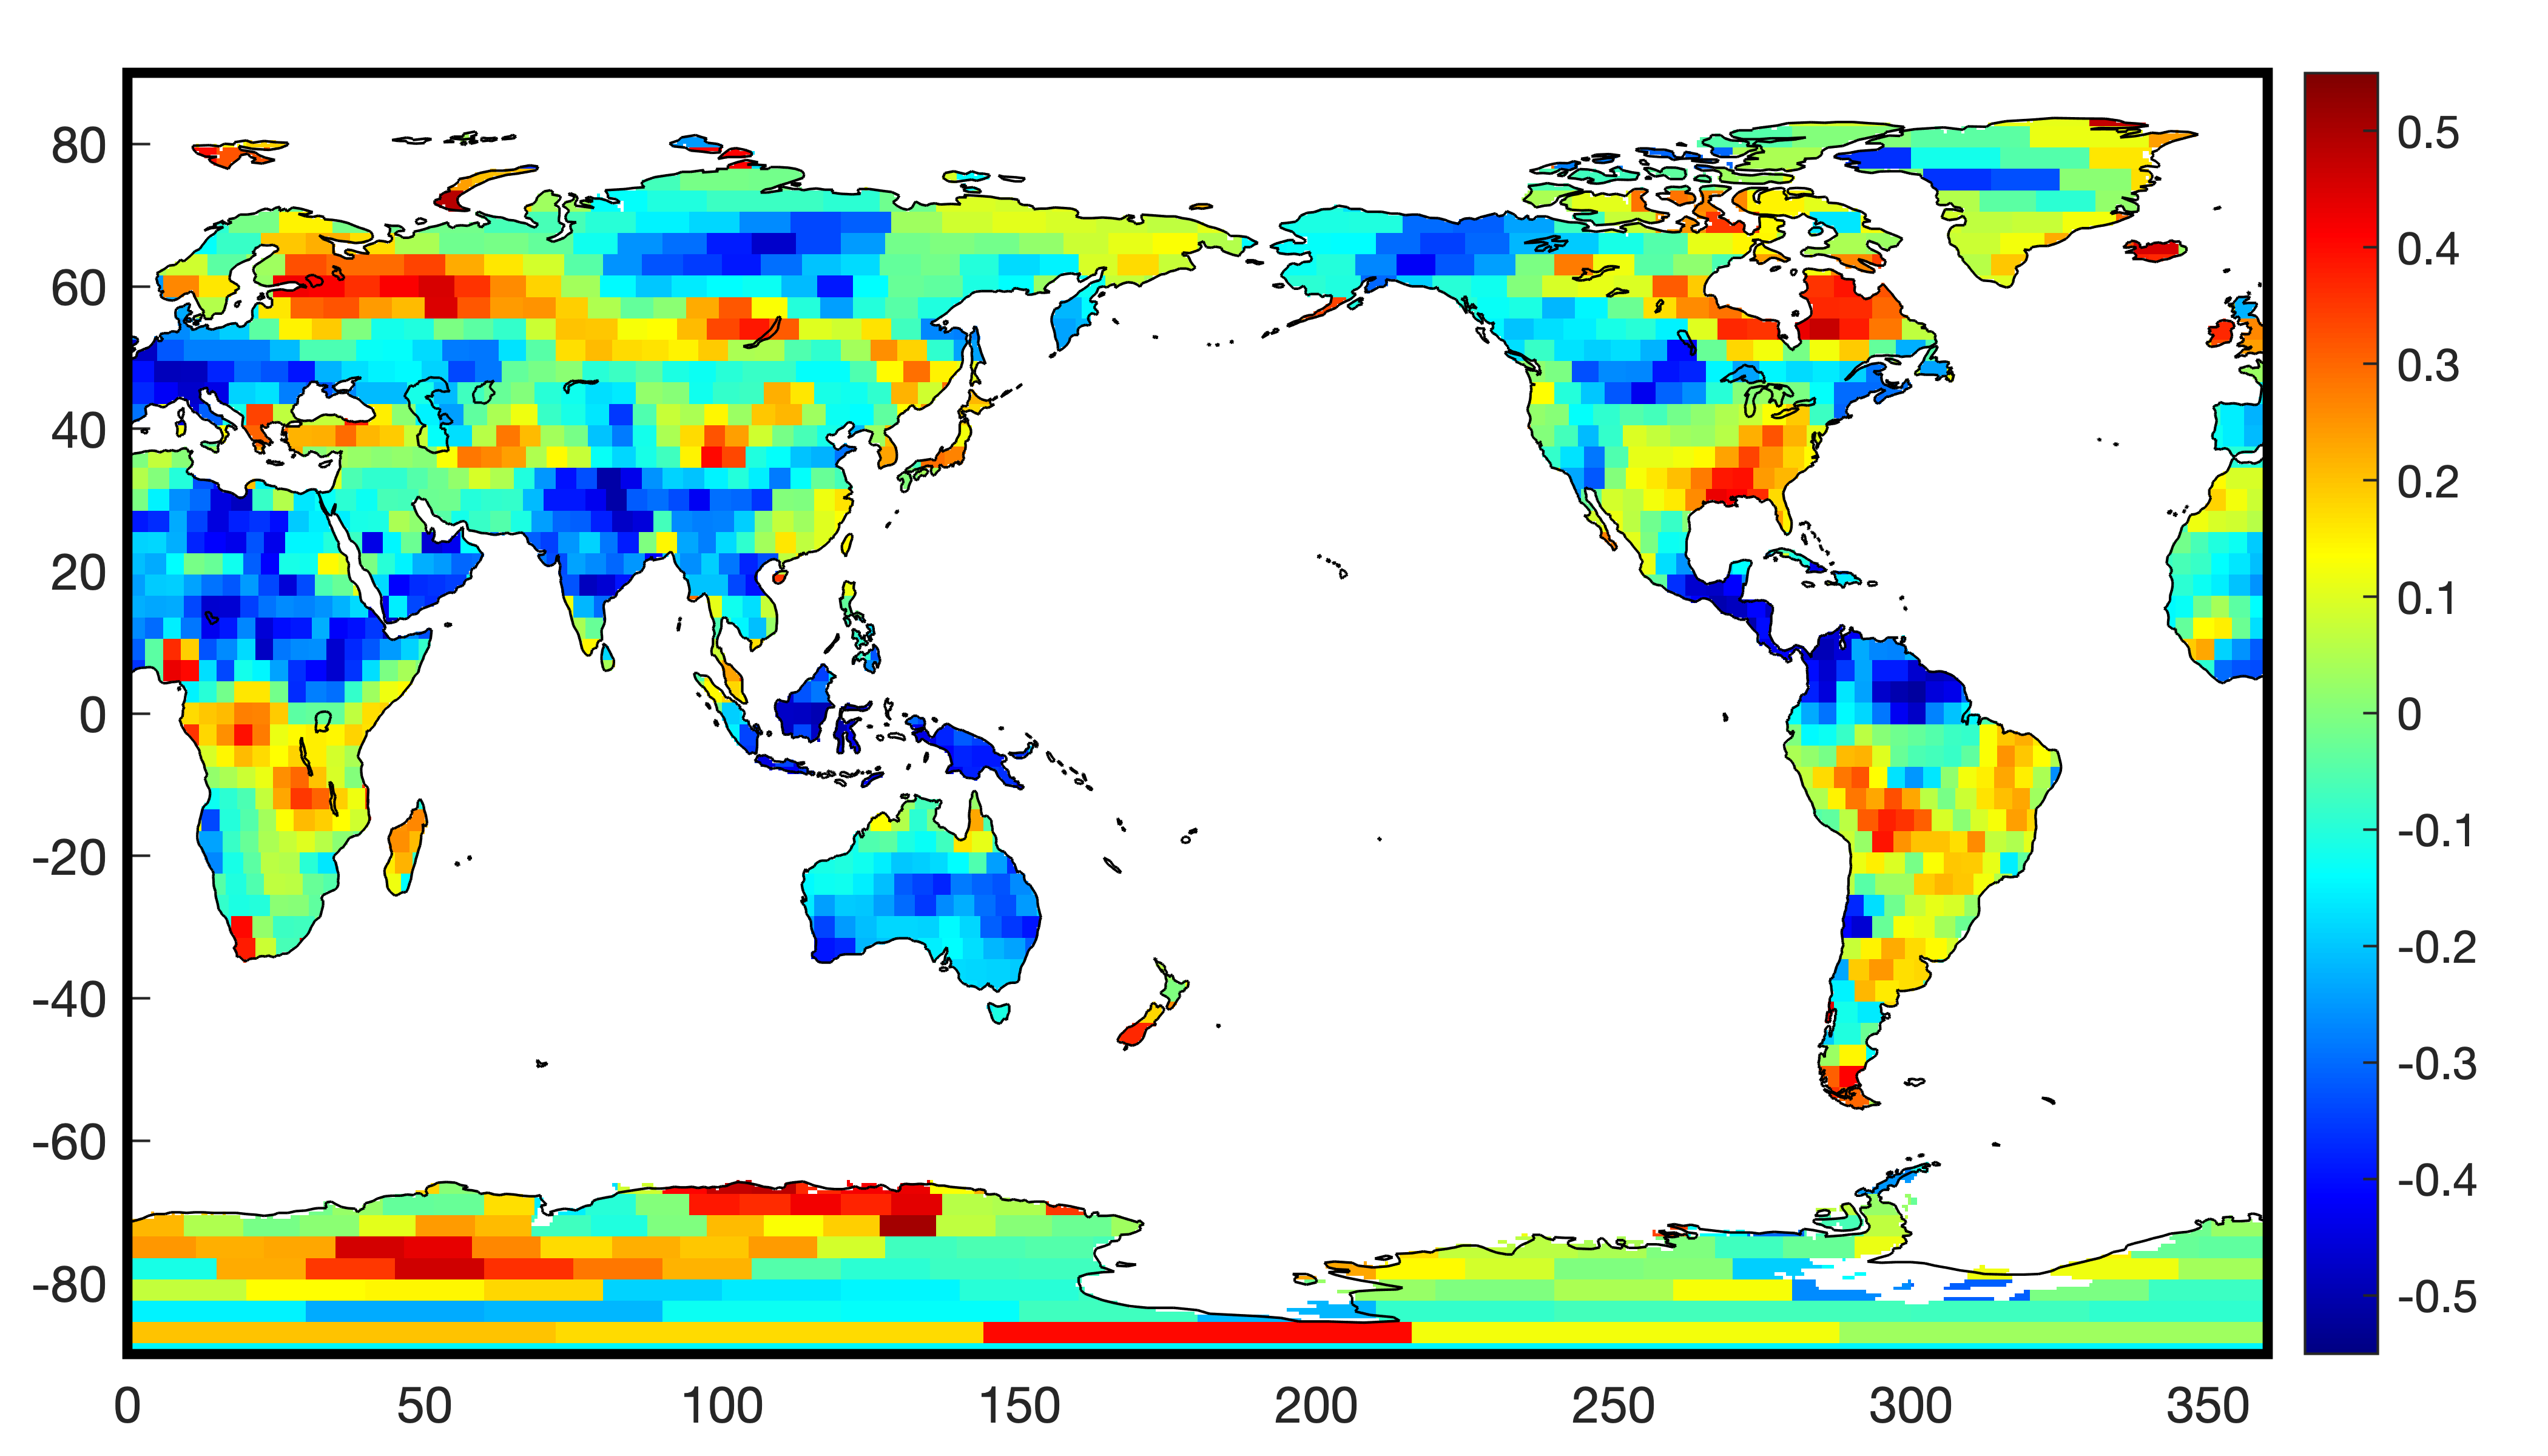


Figure S1. The correlation coefficient between the Interannual climate index and CSEOF HF-mode at each grid.


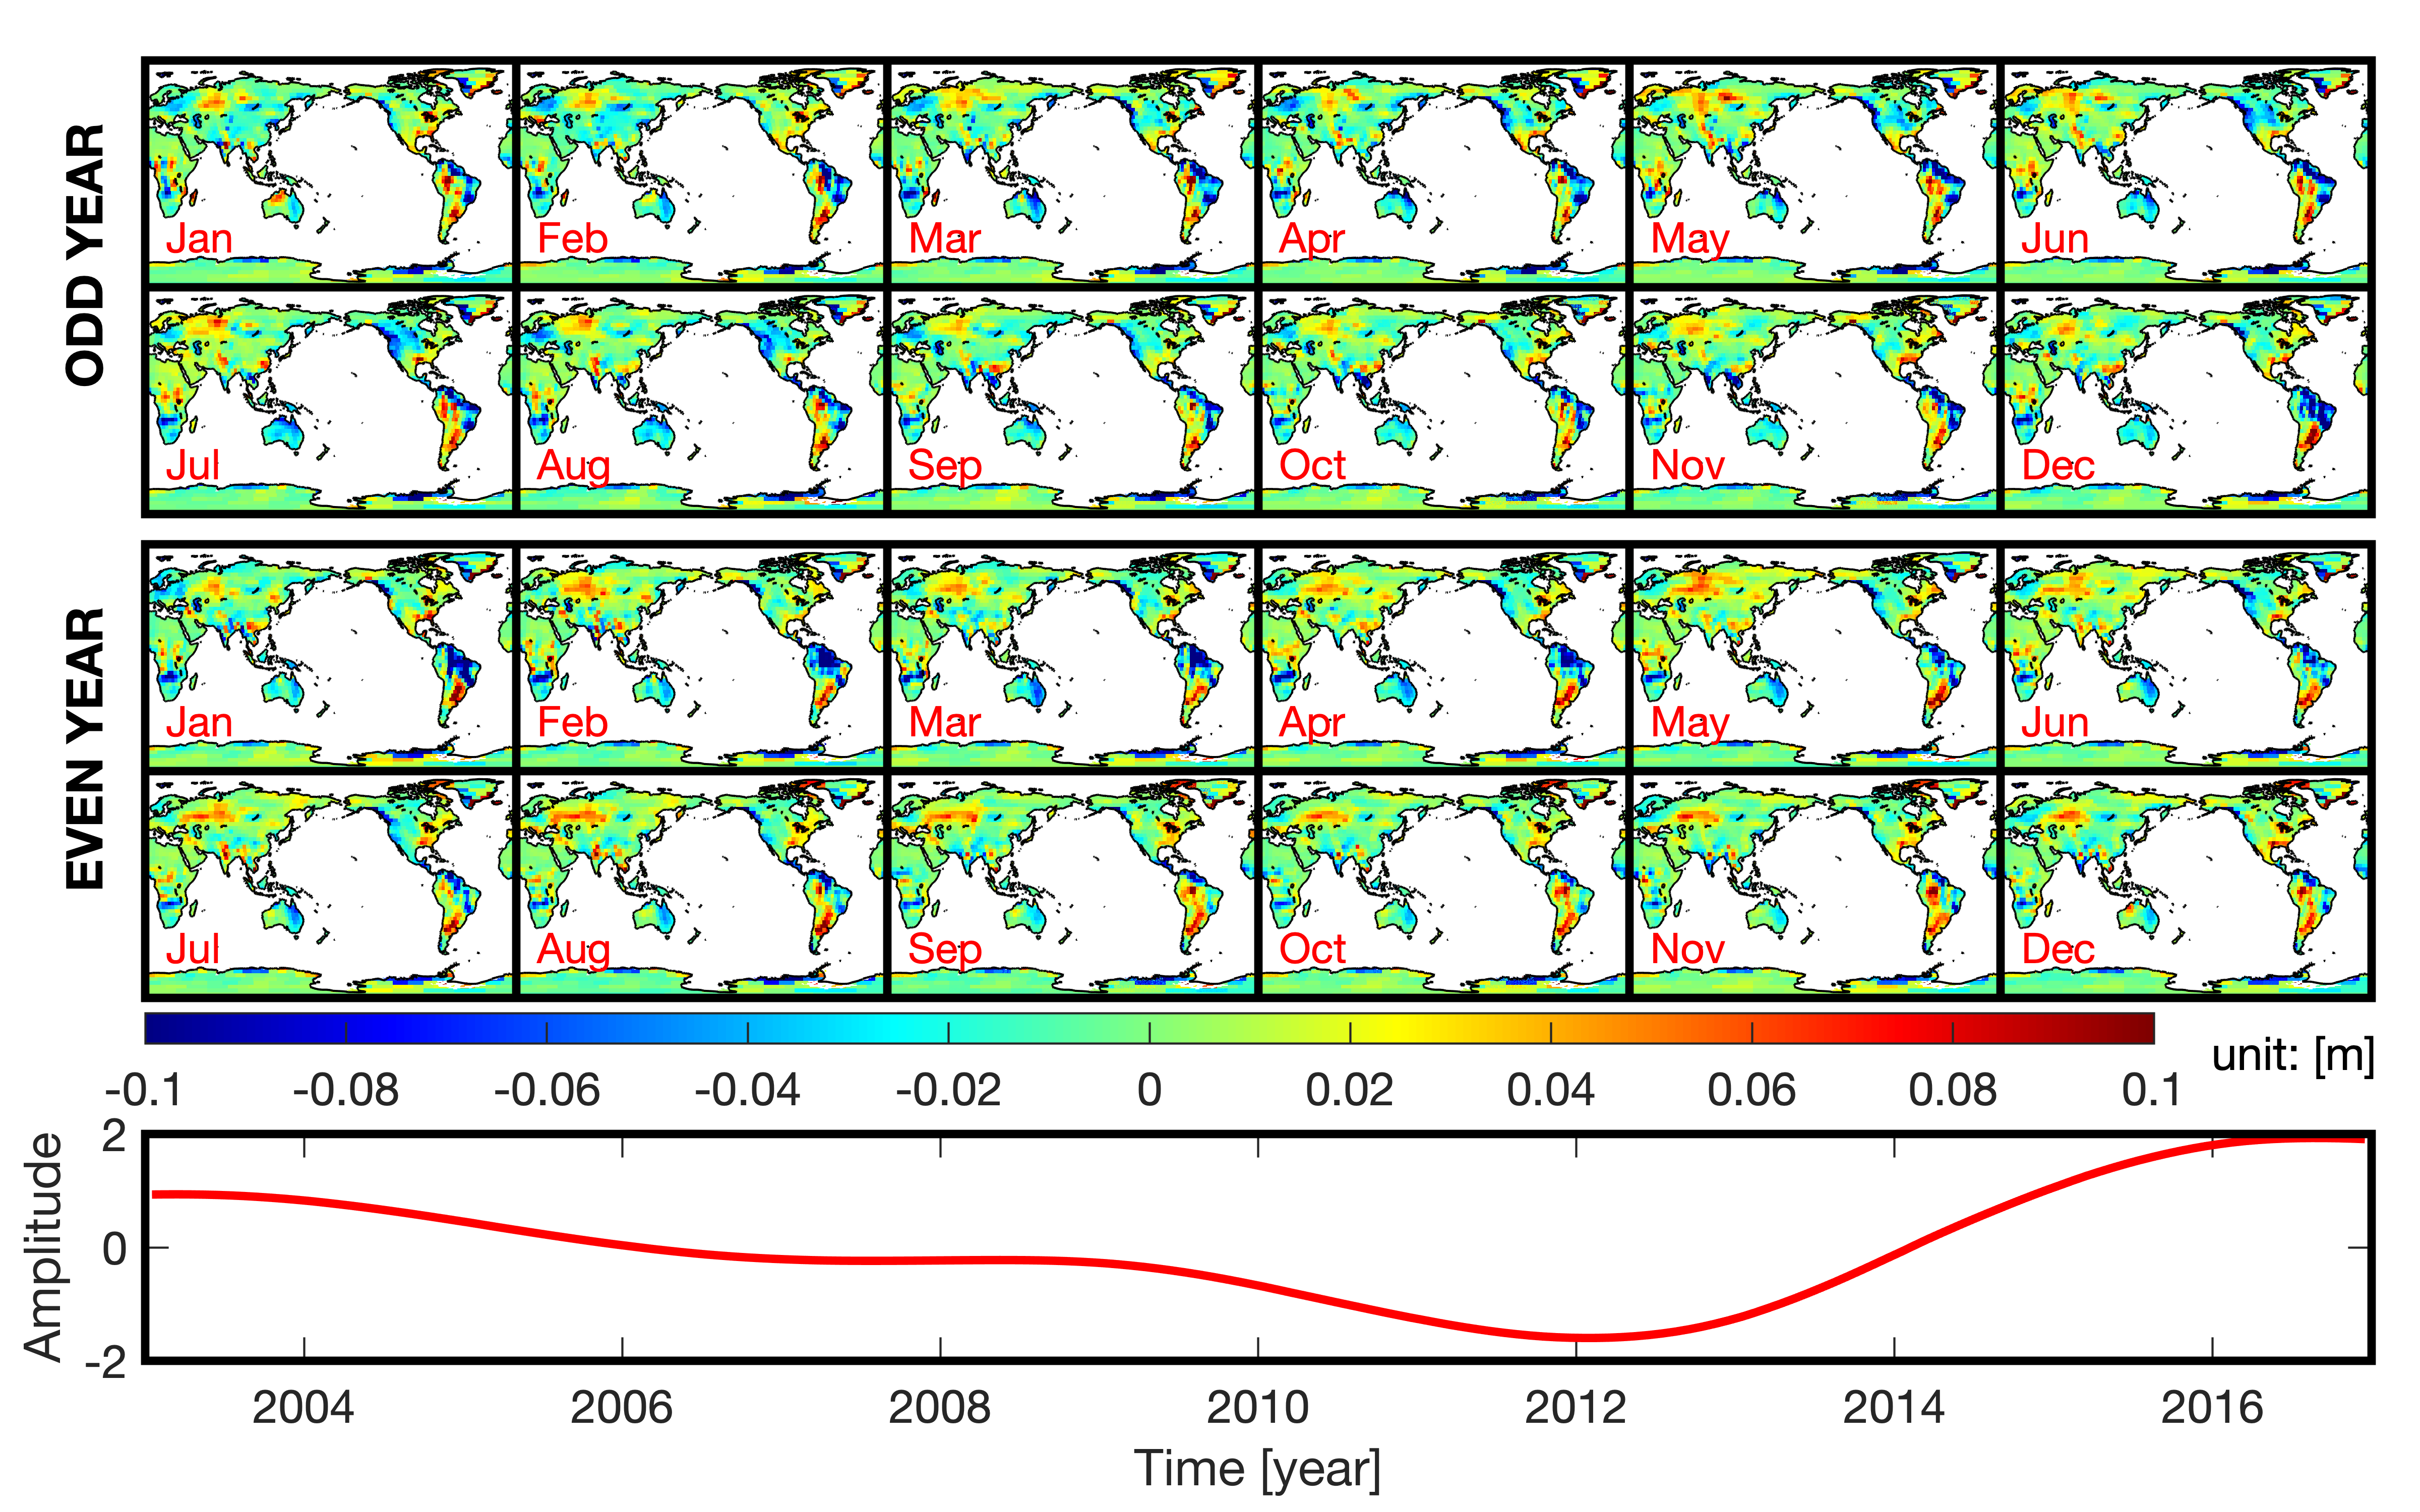


Figure S2. The LV and PCT of the LF-mode of the CSEOF analysis of GRACE.


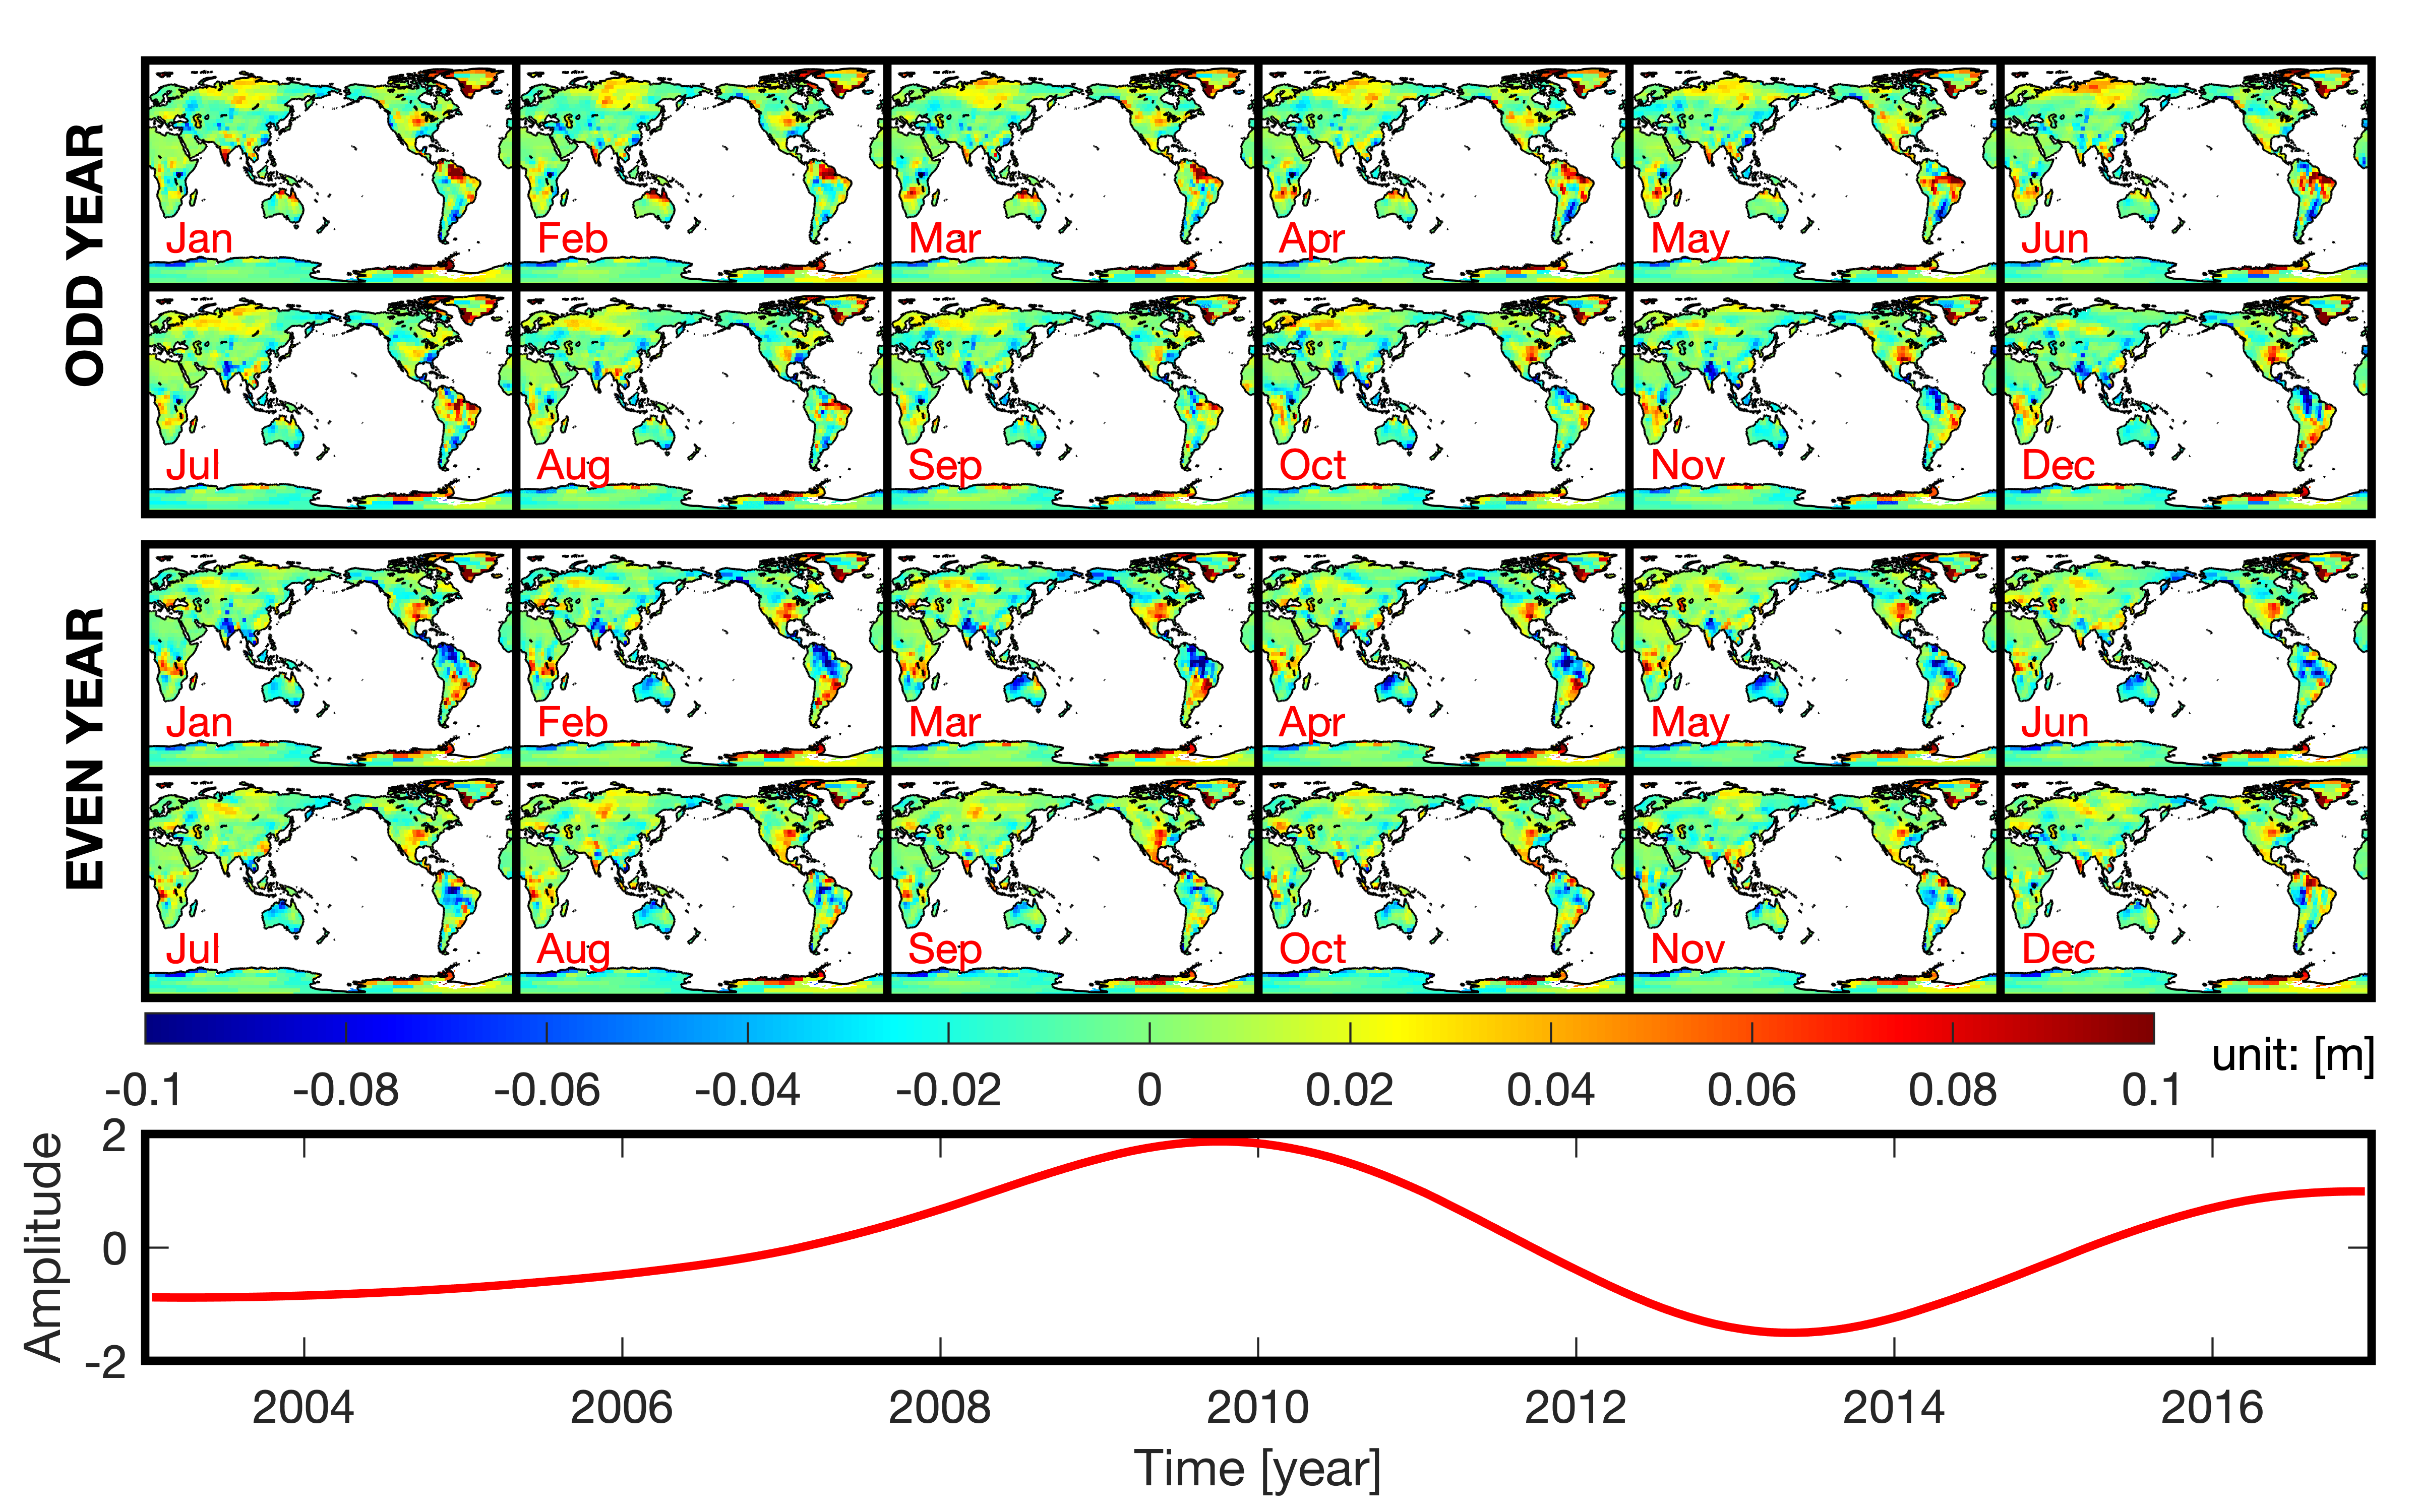


Figure S3. The LV and PCT of the HF-mode of the CSEOF analysis of GRACE.
